# Supplementary material for: Thymoquinone, piperine, and sorafenib combinations attenuate liver and breast cancers progression: epigenetic and molecular docking approaches
Source: PubMed Central journal article supplement (PMC9985300; doi:10.1186/s12906-023-03872-6), 2023-03-04
Supplement: 12906_2023_3872_MOESM2_ESM.pdf [file 12906_2023_3872_MOESM2_ESM.pdf]

|   | Title                                                                                                                              | Status     | Study Results        | Conditions                                                                                    | Interventions                                                                                                        | Locations                                                                                                                                                                                                                                                                                                                                                                                                                                                                                                                              |
|---|------------------------------------------------------------------------------------------------------------------------------------|------------|----------------------|-----------------------------------------------------------------------------------------------|----------------------------------------------------------------------------------------------------------------------|----------------------------------------------------------------------------------------------------------------------------------------------------------------------------------------------------------------------------------------------------------------------------------------------------------------------------------------------------------------------------------------------------------------------------------------------------------------------------------------------------------------------------------------|
| 1 | <a href="#">Dose Escalation Study of OMP-54F28 in Combination With Sorafenib in Patients With Hepatocellular Cancer</a>            | Completed  | No Results Available | <ul style="list-style-type: none"> <li>Hepatocellular Cancer</li> <li>Liver Cancer</li> </ul> | <ul style="list-style-type: none"> <li>Drug: OMP-54F28 with Sorafenib</li> </ul>                                     | <ul style="list-style-type: none"> <li>USC/Norris Comprehensive Cancer Center, Los Angeles, California, United States</li> <li>University of Colorado Cancer Center, Aurora, Colorado, United States</li> <li>Indiana University Simon Cancer Center, Indianapolis, Indiana, United States</li> <li>Massachusetts General Hospital, Boston, Massachusetts, United States</li> <li>Mount Sinai Medical Center, New York, New York, United States</li> <li>Fox Chase Cancer Center, Philadelphia, Pennsylvania, United States</li> </ul> |
| 2 | <a href="#">A Phase II Trial of OSI-906 and Sorafenib in Advanced Hepatocellular Cancer</a>                                        | Terminated | Has Results          | <ul style="list-style-type: none"> <li>Liver Cancer</li> </ul>                                | <ul style="list-style-type: none"> <li>Drug: Sorafenib and OSI-906</li> </ul>                                        | <ul style="list-style-type: none"> <li>Emory University Winship Cancer Institute, Atlanta, Georgia, United States</li> <li>University of Michigan, Ann Arbor, Michigan, United States</li> <li>Ohio State University, Columbus, Ohio, United States</li> </ul>                                                                                                                                                                                                                                                                         |
| 3 | <a href="#">Sorafenib Plus Capecitabine (SorCape) in Previously Treated Metastatic Colorectal Cancer</a>                           | Completed  | Has Results          | <ul style="list-style-type: none"> <li>Colorectal Cancer Metastatic</li> </ul>                | <ul style="list-style-type: none"> <li>Drug: Sorafenib Plus Capecitabine (SorCape)</li> </ul>                        | <ul style="list-style-type: none"> <li>UF Health Cancer Center, Gainesville, Florida, United States</li> </ul>                                                                                                                                                                                                                                                                                                                                                                                                                         |
| 4 | <a href="#">Preoperative Trial of Sorafenib in Combination With Cisplatin Followed by Paclitaxel for Early Stage Breast Cancer</a> | Terminated | Has Results          | <ul style="list-style-type: none"> <li>Breast Cancer</li> </ul>                               | <ul style="list-style-type: none"> <li>Drug: Sorafenib</li> <li>Drug: Cisplatin</li> <li>Drug: Paclitaxel</li> </ul> | <ul style="list-style-type: none"> <li>Grady Memorial Hospital, Atlanta, Georgia, United States</li> <li>Emory University Hospital Midtown, Atlanta, Georgia, United States</li> <li>Emory University Winship Cancer Institute, Atlanta, Georgia, United States</li> </ul>                                                                                                                                                                                                                                                             |
| 5 | <a href="#">Safety and Efficacy of Sorafenib in Patients With Advanced Thyroid Cancer: a Phase II Clinical Study</a>               | Completed  | No Results Available | <ul style="list-style-type: none"> <li>Thyroid Cancer</li> </ul>                              | <ul style="list-style-type: none"> <li>Drug: Sorafenib</li> </ul>                                                    | <ul style="list-style-type: none"> <li>Instituto Nacional de Cancerología, Bogotá, Cundinamarca, Colombia</li> </ul>                                                                                                                                                                                                                                                                                                                                                                                                                   |
| 6 | <a href="#">BAY43-9006 - Phase II in Advanced Breast Cancer</a>                                                                    | Completed  | Has Results          | <ul style="list-style-type: none"> <li>Breast Neoplasms</li> <li>Breast Cancer</li> </ul>     | <ul style="list-style-type: none"> <li>Drug: Sorafenib (Nexavar, BAY43-9006)</li> </ul>                              | <ul style="list-style-type: none"> <li>Stuttgart, Baden-Württemberg, Germany</li> <li>München, Bayern, Germany</li> <li>Frankfurt, Hessen, Germany</li> <li>Bologna, Italy</li> <li>Milano, Italy</li> <li>Milano, Italy</li> <li>Parma, Italy</li> </ul>                                                                                                                                                                                                                                                                              |
| 7 | <a href="#">Sorafenib and Vinorelbine in Treating Women With Stage IV Breast Cancer</a>                                            | Completed  | Has Results          | <ul style="list-style-type: none"> <li>Breast Cancer</li> </ul>                               | <ul style="list-style-type: none"> <li>Drug: sorafenib tosylate</li> <li>Drug: vinorelbine ditartrate</li> </ul>     | <ul style="list-style-type: none"> <li>City of Hope Medical Center, Duarte, California, United States</li> <li>South Pasadena Cancer Center, Pasadena, California, United States</li> </ul>                                                                                                                                                                                                                                                                                                                                            |
| 8 | <a href="#">Phase II Trial of Vemurafenib and Sorafenib in Pancreatic Cancer</a>                                                   | Recruiting | No Results Available | <ul style="list-style-type: none"> <li>Pancreas Cancer</li> </ul>                             | <ul style="list-style-type: none"> <li>Drug: Vemurafenib</li> <li>Drug: Sorafenib</li> </ul>                         | <ul style="list-style-type: none"> <li>HonorHealth Research Institute, Scottsdale, Arizona, United States</li> </ul>                                                                                                                                                                                                                                                                                                                                                                                                                   |
| 9 | <a href="#">Phase I/II Trial of Letrozole and Sorafenib in Post-Menopausal Hormone-Receptor + Breast Cancer</a>                    | Terminated | No Results Available | <ul style="list-style-type: none"> <li>Metastatic Breast Cancer</li> </ul>                    | <ul style="list-style-type: none"> <li>Drug: Sorafenib</li> <li>Drug: Letrozole</li> </ul>                           | <ul style="list-style-type: none"> <li>Georgetown University Hospital, Washington, District of Columbia, United States</li> <li>Emory University, Atlanta, Georgia, United States</li> <li>Rutgers Cancer Institute of New Jersey, New Brunswick, New Jersey, United States</li> <li>Cooper Hospital/University Medical Center, Voorhees, New Jersey, United States</li> </ul>                                                                                                                                                         |

|    | Title                                                                                                                                 | Status                 | Study Results        | Conditions                     | Interventions                                                     | Locations                                                                                                                                                                                                                                                                                                                                                                                                                                                                                                                                                                                                                                                                                                                                                             |
|----|---------------------------------------------------------------------------------------------------------------------------------------|------------------------|----------------------|--------------------------------|-------------------------------------------------------------------|-----------------------------------------------------------------------------------------------------------------------------------------------------------------------------------------------------------------------------------------------------------------------------------------------------------------------------------------------------------------------------------------------------------------------------------------------------------------------------------------------------------------------------------------------------------------------------------------------------------------------------------------------------------------------------------------------------------------------------------------------------------------------|
| 10 | <a href="#">Sorafenib and Paclitaxel in Treating Patients With Metastatic Breast Cancer</a>                                           | Terminated             | Has Results          | •Breast Cancer                 | •Drug: paclitaxel<br>•Drug: sorafenib tosylate                    | •University of Texas Southwestern Medical Center, Dallas, Texas, United States                                                                                                                                                                                                                                                                                                                                                                                                                                                                                                                                                                                                                                                                                        |
| 11 | <a href="#">Trial of Sorafenib in Hepatocellular Cancer (HCC) Transplant Patients</a>                                                 | Completed              | No Results Available | •Hepatocellular Cancer         | •Drug: Sorafenib                                                  | •University of Southern California, Los Angeles, California, United States<br>•University of California, Los Angeles, Los Angeles, California, United States<br>•Columbia University Medical Center, New York, New York, United States                                                                                                                                                                                                                                                                                                                                                                                                                                                                                                                                |
| 12 | <a href="#">Study of Everolimus and Sorafenib in Patients With Advanced Thyroid Cancer Who Progressed on Sorafenib Alone</a>          | Active, not recruiting | No Results Available | •Differentiated Thyroid Cancer | •Drug: Everolimus<br>•Drug: Sorafenib                             | •Hospital of the University of Pennsylvania, Philadelphia, Pennsylvania, United States                                                                                                                                                                                                                                                                                                                                                                                                                                                                                                                                                                                                                                                                                |
| 13 | <a href="#">Safety Study of Sorafenib With Androgen Deprivation and Radiotherapy to Treat Prostate Cancer</a>                         | Terminated             | Has Results          | •Prostate Cancer               | •Drug: Leuprolide acetate, Bicalutamide, Sorafenib                | •St.Luke's-Roosevelt Hospital Center, New York, New York, United States                                                                                                                                                                                                                                                                                                                                                                                                                                                                                                                                                                                                                                                                                               |
| 14 | <a href="#">Study Adding Multikinase Inhibitor Sorafenib to Existing Endocrine Therapy in Patients With Advanced Breast Cancer</a>    | Terminated             | Has Results          | •Breast Cancer                 | •Drug: sorafenib                                                  | •University of Kentucky, Lexington, Kentucky, United States                                                                                                                                                                                                                                                                                                                                                                                                                                                                                                                                                                                                                                                                                                           |
| 15 | <a href="#">Sorafenib Induced Autophagy Using Hydroxychloroquine in Hepatocellular Cancer</a>                                         | Recruiting             | No Results Available | •Hepatocellular Cancer         | •Drug: Sorafenib (SOR)<br>•Drug: Hydroxychloroquine (HCQ)         | •University of Texas Health Cancer Center, San Antonio, Texas, United States                                                                                                                                                                                                                                                                                                                                                                                                                                                                                                                                                                                                                                                                                          |
| 16 | <a href="#">A Phase I Trial Evaluating mFOLFOX6 and Avastin With Nexavar as First-Line Treatment for Metastatic Colorectal Cancer</a> | Terminated             | Has Results          | •Metastatic Colorectal Cancer  | •Drug: sorafenib<br>•Drug: bevacizumab<br>•Drug: mFOLFOX6 regimen | •Central Georgia Cancer Care, Macon, Georgia, United States<br>•Hematology Oncology Centers of the Northern Rockies, Billings, Montana, United States<br>•The West Clinic, Memphis, Tennessee, United States                                                                                                                                                                                                                                                                                                                                                                                                                                                                                                                                                          |
| 17 | <a href="#">Paclitaxel and Carboplatin With Or Without Sorafenib In The First-Line Treatment Of Patients With Ovarian Cancer</a>      | Completed              | Has Results          | •Ovarian Cancer                | •Drug: Sorafenib<br>•Drug: Paclitaxel<br>•Drug: Carboplatin       | •Northeast Arkansas Clinic, Jonesboro, Arkansas, United States<br>•Florida Cancer Specialists, Fort Myers, Florida, United States<br>•Holy Cross Hospital, Ft. Lauderdale, Florida, United States<br>•Gulfcoast Oncology Associates, St. Petersburg, Florida, United States<br>•Medical College of Georgia Cancer Specialists, Augusta, Georgia, United States<br>•Providence Medical Group, Terre Haute, Indiana, United States<br>•Center for Cancer and Blood Disorders, Bethesda, Maryland, United States<br>•National Capital Clinical Research Consortium, Bethesda, Maryland, United States<br>•St. Joseph Mercy Hospital, Ann Arbor, Michigan, United States<br>•Grand Rapids Clinical Oncology Program, Grand Rapids, Michigan, United States<br>•and 7 more |

|    | Title                                                                                                                                                                                                                    | Status     | Study Results        | Conditions         | Interventions                                                                                                                                                                | Locations                                                                                                                                                                                                                                                                                                                                                                                                                                                                                                                                                                                                                                                                                          |
|----|--------------------------------------------------------------------------------------------------------------------------------------------------------------------------------------------------------------------------|------------|----------------------|--------------------|------------------------------------------------------------------------------------------------------------------------------------------------------------------------------|----------------------------------------------------------------------------------------------------------------------------------------------------------------------------------------------------------------------------------------------------------------------------------------------------------------------------------------------------------------------------------------------------------------------------------------------------------------------------------------------------------------------------------------------------------------------------------------------------------------------------------------------------------------------------------------------------|
| 18 | <a href="#">Phase III Trial Comparing Capecitabine in Combination With Sorafenib or Placebo in the Treatment of Locally Advanced or Metastatic HER2-Negative Breast Cancer</a>                                           | Completed  | Has Results          | •Breast Cancer     | <ul style="list-style-type: none"> <li>•Drug: Sorafenib (Nexavar, BAY43-9006)</li> <li>•Drug: Placebo</li> <li>•Drug: Capecitabine</li> </ul>                                | <ul style="list-style-type: none"> <li>•Greenbrae, California, United States</li> <li>•Sylmar, California, United States</li> <li>•West Palm Beach, Florida, United States</li> <li>•Joliet, Illinois, United States</li> <li>•Evansville, Indiana, United States</li> <li>•Louisville, Kentucky, United States</li> <li>•Boston, Massachusetts, United States</li> <li>•Boston, Massachusetts, United States</li> <li>•Jackson, Mississippi, United States</li> <li>•Springfield, Missouri, United States</li> <li>•and 143 more</li> </ul>                                                                                                                                                       |
| 19 | <a href="#">Sorafenib Tosylate Before and After Hepatic Arterial Chemoembolization With Doxorubicin Hydrochloride and Mitomycin C in Treating Patients With Localized Liver Cancer That Cannot Be Removed by Surgery</a> | Completed  | No Results Available | •Liver Cancer      | <ul style="list-style-type: none"> <li>•Drug: sorafenib tosylate, HACE : Doxorubicin Hydrochloride and Mitomycin C</li> <li>•Other: laboratory biomarker analysis</li> </ul> | <ul style="list-style-type: none"> <li>•Rutgers University Hospital, Newark, New Jersey, United States</li> </ul>                                                                                                                                                                                                                                                                                                                                                                                                                                                                                                                                                                                  |
| 20 | <a href="#">Sorafenib and Docetaxel in Patients With Prostate Cancer That Did Not Respond to Previous Hormone Therapy</a>                                                                                                | Completed  | Has Results          | •Prostate Cancer   | <ul style="list-style-type: none"> <li>•Drug: docetaxel</li> <li>•Drug: sorafenib tosylate</li> </ul>                                                                        | <ul style="list-style-type: none"> <li>•Abramson Cancer Center of the University of Pennsylvania, Philadelphia, Pennsylvania, United States</li> </ul>                                                                                                                                                                                                                                                                                                                                                                                                                                                                                                                                             |
| 21 | <a href="#">Study Combining Imatinib Mesylate (Gleevec) With Sorafenib in Patients With Androgen-independent Prostate Cancer (AIPC)</a>                                                                                  | Completed  | Has Results          | •Prostate Cancer   | <ul style="list-style-type: none"> <li>•Drug: Gleevec + Sorafenib</li> </ul>                                                                                                 | <ul style="list-style-type: none"> <li>•Oncology Specialists, S.C, Niles, Illinois, United States</li> <li>•Oncology Specialists, S.C, Park Ridge, Illinois, United States</li> </ul>                                                                                                                                                                                                                                                                                                                                                                                                                                                                                                              |
| 22 | <a href="#">Sorafenib and Fulvestrant in Treating Patients With Locally Advanced or Metastatic Breast Cancer That Did Not Respond to Aromatase Inhibitor Therapy</a>                                                     | Terminated | Has Results          | •Breast Cancer     | <ul style="list-style-type: none"> <li>•Drug: fulvestrant</li> <li>•Drug: sorafenib tosylate</li> </ul>                                                                      | <ul style="list-style-type: none"> <li>•OHSU Knight Cancer Institute, Portland, Oregon, United States</li> </ul>                                                                                                                                                                                                                                                                                                                                                                                                                                                                                                                                                                                   |
| 23 | <a href="#">A Phase II Study of BAY 43-9006 (Sorafenib) in Metastatic, Androgen-Independent Prostate Cancer</a>                                                                                                          | Completed  | Has Results          | •Prostate Cancer   | <ul style="list-style-type: none"> <li>•Drug: BAY 43-9006</li> </ul>                                                                                                         | <ul style="list-style-type: none"> <li>•National Cancer Institute (NCI), Bethesda, Maryland, United States</li> </ul>                                                                                                                                                                                                                                                                                                                                                                                                                                                                                                                                                                              |
| 24 | <a href="#">External-Beam Radiation Therapy, Capecitabine, and Sorafenib in Treating Patients With Locally Advanced Rectal Cancer</a>                                                                                    | Completed  | No Results Available | •Colorectal Cancer | <ul style="list-style-type: none"> <li>•Drug: capecitabine</li> <li>•Drug: sorafenib tosylate</li> <li>•Radiation: radiation therapy</li> </ul>                              | <ul style="list-style-type: none"> <li>•Szent Laszlo Korhaz, Budapest, Hungary</li> <li>•Saint Claraspital AG, Basel, Switzerland</li> <li>•Universitaetsspital-Basel, Basel, Switzerland</li> <li>•Istituto Oncologico della Svizzera Italiana - Ospedale Regionale Bellinzona e Valli, Bellinzona, Switzerland</li> <li>•Inselspital, Bern, Bern, Switzerland</li> <li>•Spitalzentrum Biel, Biel, Switzerland</li> <li>•Kantonsspital Bruderholz, Bruderholz, Switzerland</li> <li>•Kantonsspital Graubuenden, Chur, Switzerland</li> <li>•Hopital Cantonal Universitaire de Geneva HUG, Geneva, Switzerland</li> <li>•Kantonsspital Luzern, Luzern, Switzerland</li> <li>•and 8 more</li> </ul> |

|    | Title                                                                                                                                                   | Status     | Study Results | Conditions                | Interventions                          | Locations                                                                                                                                                                                                                                                                                                                                                                                                                                                                                                                                                                                                                                                                                                                                                                                                                                                   |
|----|---------------------------------------------------------------------------------------------------------------------------------------------------------|------------|---------------|---------------------------|----------------------------------------|-------------------------------------------------------------------------------------------------------------------------------------------------------------------------------------------------------------------------------------------------------------------------------------------------------------------------------------------------------------------------------------------------------------------------------------------------------------------------------------------------------------------------------------------------------------------------------------------------------------------------------------------------------------------------------------------------------------------------------------------------------------------------------------------------------------------------------------------------------------|
| 25 | <a href="#">Phase I/II Trial of Sorafenib Plus Ixabepilone in HER2-Negative Metastatic Breast Cancer</a>                                                | Completed  | Has Results   | •Metastatic Breast Cancer | •Drug: Sorafenib<br>•Drug: Ixabepilone | <ul style="list-style-type: none"> <li>•Florida Cancer Specialists, Ft. Myers, Florida, United States</li> <li>•Providence Medical Group, Terre Haute, Indiana, United States</li> <li>•RHHP/ Hope Cancer Center, Terre Haute, Indiana, United States</li> <li>•Baptist Hospital East, Louisville, Kentucky, United States</li> <li>•Hematology Oncology Clinic, LLP, Baton Rouge, Louisiana, United States</li> <li>•Mercy Hospital, Portland, Maine, United States</li> <li>•Center for Cancer and Blood Disorders, Bethesda, Maryland, United States</li> <li>•National Capital Clinical Research Consortium, Bethesda, Maryland, United States</li> <li>•St. Louis Cancer Care, Chesterfield, Missouri, United States</li> <li>•Portsmouth Regional Hospital, Portsmouth, New Hampshire, United States</li> <li>•and 5 more</li> </ul>                  |
| 26 | <a href="#">Sorafenib in Treating Patients With Refractory Non-Small Cell Lung Cancer</a>                                                               | Completed  | Has Results   | •Lung Cancer              | •Drug: Sorafenib<br>•Drug: Placebo     | <ul style="list-style-type: none"> <li>•Stanford Comprehensive Cancer Center - Stanford, Stanford, California, United States</li> <li>•Aurora Presbyterian Hospital, Aurora, Colorado, United States</li> <li>•Boulder Community Hospital, Boulder, Colorado, United States</li> <li>•Penrose Cancer Center at Penrose Hospital, Colorado Springs, Colorado, United States</li> <li>•Porter Adventist Hospital, Denver, Colorado, United States</li> <li>•Presbyterian - St. Luke's Medical Center, Denver, Colorado, United States</li> <li>•St. Joseph Hospital, Denver, Colorado, United States</li> <li>•Rose Medical Center, Denver, Colorado, United States</li> <li>•CCOP - Colorado Cancer Research Program, Denver, Colorado, United States</li> <li>•Swedish Medical Center, Englewood, Colorado, United States</li> <li>•and 131 more</li> </ul> |
| 27 | <a href="#">Sorafenib in Treating Non-Smokers or Former Light Smokers With Relapsed or Refractory Stage IIIB or Stage IV Non-Small Cell Lung Cancer</a> | Terminated | Has Results   | •Lung Cancer              | •Drug: sorafenib                       | <ul style="list-style-type: none"> <li>•Ohio State University, Columbus, Ohio, United States</li> </ul>                                                                                                                                                                                                                                                                                                                                                                                                                                                                                                                                                                                                                                                                                                                                                     |

|    | Title                                                                                                                                    | Status         | Study Results        | Conditions                                                                                   | Interventions                                                                                                        | Locations                                                                                                                                                                                                                                                                                                                                                                                                                                                                                                                                                                                                                                                                                                                                                                                                                                                                                                                                                                                                                                                                                                                                                                                                           |
|----|------------------------------------------------------------------------------------------------------------------------------------------|----------------|----------------------|----------------------------------------------------------------------------------------------|----------------------------------------------------------------------------------------------------------------------|---------------------------------------------------------------------------------------------------------------------------------------------------------------------------------------------------------------------------------------------------------------------------------------------------------------------------------------------------------------------------------------------------------------------------------------------------------------------------------------------------------------------------------------------------------------------------------------------------------------------------------------------------------------------------------------------------------------------------------------------------------------------------------------------------------------------------------------------------------------------------------------------------------------------------------------------------------------------------------------------------------------------------------------------------------------------------------------------------------------------------------------------------------------------------------------------------------------------|
| 28 | <a href="#">Sorafenib in Treating Patients With Kidney Cancer That Has Spread to the Brain</a>                                           | Completed      | No Results Available | <ul style="list-style-type: none"> <li>•Kidney Cancer</li> <li>•Metastatic Cancer</li> </ul> | <ul style="list-style-type: none"> <li>•Drug: sorafenib tosylate</li> </ul>                                          | <ul style="list-style-type: none"> <li>•University of Chicago Cancer Research Center, Chicago, Illinois, United States</li> <li>•Decatur Memorial Hospital Cancer Care Institute, Decatur, Illinois, United States</li> <li>•Evanston Northwestern Health Care - Evanston Hospital, Evanston, Illinois, United States</li> <li>•Ingalls Cancer Care Center at Ingalls Memorial Hospital, Harvey, Illinois, United States</li> <li>•Cardinal Bernardin Cancer Center at Loyola University Medical Center, Maywood, Illinois, United States</li> <li>•Oncology Hematology Associates of Central Illinois, PC - Peoria, Peoria, Illinois, United States</li> <li>•Central Illinois Hematology Oncology Center, Springfield, Illinois, United States</li> <li>•Fort Wayne Medical Oncology and Hematology, Fort Wayne, Indiana, United States</li> <li>•CCOP - Northern Indiana CR Consortium, South Bend, Indiana, United States</li> <li>•Oncology Care Associates, PLLC, Saint Joseph, Michigan, United States</li> <li>•David C. Pratt Cancer Center at St. John's Mercy, Saint Louis, Missouri, United States</li> <li>•Medical College of Wisconsin Cancer Center, Milwaukee, Wisconsin, United States</li> </ul> |
| 29 | <a href="#">Sorafenib and Radiotherapy in the Treatment of Invasive Bladder Cancer With Conservative Intent</a>                          | Completed      | No Results Available | <ul style="list-style-type: none"> <li>•Bladder Cancer</li> </ul>                            | <ul style="list-style-type: none"> <li>•Drug: Sorafenib</li> <li>•Procedure: Radiotherapy</li> </ul>                 | <ul style="list-style-type: none"> <li>•Hospital Clínic i Provincial de Barcelona, Barcelona, Spain</li> <li>•Hospital de la Santa Creu i Sant Pau, Barcelona, Spain</li> <li>•Institut Català d' Oncologia, Barcelona, Spain</li> </ul>                                                                                                                                                                                                                                                                                                                                                                                                                                                                                                                                                                                                                                                                                                                                                                                                                                                                                                                                                                            |
| 30 | <a href="#">Sorafenib Plus Capecitabine Efficacy Assessment in Patients With Advanced Pre-treated Colorectal Cancer</a>                  | Completed      | No Results Available | <ul style="list-style-type: none"> <li>•Colorectal Cancer</li> </ul>                         | <ul style="list-style-type: none"> <li>•Drug: chemotherapy</li> </ul>                                                | <ul style="list-style-type: none"> <li>•Cliniques Universitaires Saint Luc, Woluwe Saint Lambert, Bruxelles, Belgium</li> <li>•Universiteit Ziekenhuis Antwerpen, Antwerpen, Belgium</li> <li>•Institut Jules Bordet, Brussels, Belgium</li> <li>•Hopital Erasme, Brussels, Belgium</li> <li>•Entité Jolimontoise, La Louviere, Belgium</li> <li>•Hopitaux St Joseph, Liege, Belgium</li> <li>•CHU Ambroise Paré, Mons, Belgium</li> </ul>                                                                                                                                                                                                                                                                                                                                                                                                                                                                                                                                                                                                                                                                                                                                                                          |
| 31 | <a href="#">Sorafenib and Thoracic Radiation for Patients With Non-Small Cell Lung Cancer</a>                                            | Terminated     | No Results Available | <ul style="list-style-type: none"> <li>•Lung Cancer</li> </ul>                               | <ul style="list-style-type: none"> <li>•Drug: Sorafenib</li> <li>•Procedure: Radiation Therapy</li> </ul>            | <ul style="list-style-type: none"> <li>•UT MD . Anderson Cancer Center, Houston, Texas, United States</li> </ul>                                                                                                                                                                                                                                                                                                                                                                                                                                                                                                                                                                                                                                                                                                                                                                                                                                                                                                                                                                                                                                                                                                    |
| 32 | <a href="#">Phase IB/II Trial Combining Vinorelbine With Sorafenib as First-Line Treatment in Patients With Metastatic Breast Cancer</a> | Unknown status | No Results Available | <ul style="list-style-type: none"> <li>•Metastatic Breast Cancer</li> </ul>                  | <ul style="list-style-type: none"> <li>•Drug: Sorafenib and Vinorelbine</li> </ul>                                   | <ul style="list-style-type: none"> <li>•Jewish General Hospital, Montreal, Quebec, Canada</li> </ul>                                                                                                                                                                                                                                                                                                                                                                                                                                                                                                                                                                                                                                                                                                                                                                                                                                                                                                                                                                                                                                                                                                                |
| 33 | <a href="#">Sorafenib Concurrent With Yttrium-90 Transarterial Radioembolization in Patients With Advanced Hepatocellular Cancer</a>     | Withdrawn      | No Results Available | <ul style="list-style-type: none"> <li>•Hepatocellular Cancer</li> </ul>                     | <ul style="list-style-type: none"> <li>•Drug: Sorafenib</li> <li>•Radiation: yttrium-90 radioembolization</li> </ul> | <ul style="list-style-type: none"> <li>•University of Hawaii, Honolulu, Hawaii, United States</li> </ul>                                                                                                                                                                                                                                                                                                                                                                                                                                                                                                                                                                                                                                                                                                                                                                                                                                                                                                                                                                                                                                                                                                            |
| 34 | <a href="#">Phase I Trial of Sorafenib + FOLFIRI In Metastatic Colorectal Cancer</a>                                                     | Completed      | No Results Available | <ul style="list-style-type: none"> <li>•Metastatic Colorectal Cancer</li> </ul>              | <ul style="list-style-type: none"> <li>•Drug: sorafenib + FOLFIRI</li> </ul>                                         | <ul style="list-style-type: none"> <li>•The Ottawa Hospital Cancer Centre, Ottawa, Ontario, Canada</li> </ul>                                                                                                                                                                                                                                                                                                                                                                                                                                                                                                                                                                                                                                                                                                                                                                                                                                                                                                                                                                                                                                                                                                       |

|    | Title                                                                                                                             | Status                 | Study Results        | Conditions                              | Interventions                                                | Locations                                                                                                                                                                                                                                                                                                                                                                                                                                                                                                                                                                                                                                                                                                                                                                                                                                                                     |
|----|-----------------------------------------------------------------------------------------------------------------------------------|------------------------|----------------------|-----------------------------------------|--------------------------------------------------------------|-------------------------------------------------------------------------------------------------------------------------------------------------------------------------------------------------------------------------------------------------------------------------------------------------------------------------------------------------------------------------------------------------------------------------------------------------------------------------------------------------------------------------------------------------------------------------------------------------------------------------------------------------------------------------------------------------------------------------------------------------------------------------------------------------------------------------------------------------------------------------------|
| 35 | <a href="#">Evaluating the Combination of Everolimus and Sorafenib in the Treatment of Thyroid Cancer</a>                         | Active, not recruiting | No Results Available | •Thyroid Cancer                         | •Drug: sorafenib with everolimus                             | <ul style="list-style-type: none"> <li>•Memorial Sloan Kettering Cancer Center, Basking Ridge, New Jersey, United States</li> <li>•Memorial Sloan Kettering Cancer Center @ Suffolk, Commack, New York, United States</li> <li>•Memorial Sloan Kettering Westchester, Harrison, New York, United States</li> <li>•Memorial Sloan Kettering Cancer Center, New York, New York, United States</li> </ul>                                                                                                                                                                                                                                                                                                                                                                                                                                                                        |
| 36 | <a href="#">Trametinib in Combination With Sorafenib in Patients With Advanced Hepatocellular Cancer</a>                          | Completed              | No Results Available | •Hepatocellular Cancer<br>•Liver Cancer | •Drug: Trametinib<br>•Drug: Sorafenib                        | •H. Lee Moffitt Cancer Center and Research Institute, Tampa, Florida, United States                                                                                                                                                                                                                                                                                                                                                                                                                                                                                                                                                                                                                                                                                                                                                                                           |
| 37 | <a href="#">Breast Cancer Study: Paclitaxel Versus Paclitaxel Plus Sorafenib in Second- or Third-line Treatment</a>               | Completed              | No Results Available | •Metastatic Breast Cancer               | •Drug: Paclitaxel and Sorafenib<br>•Drug: Paclitaxel         | •Germany Multiple Sites All Over Germany Recruiting Multiple Sites, Germany Contact: iOMEDICO AG, Freiburg, Germany                                                                                                                                                                                                                                                                                                                                                                                                                                                                                                                                                                                                                                                                                                                                                           |
| 38 | <a href="#">Sorafenib and Erlotinib in Treating Patients With Pancreatic Cancer That Cannot Be Removed by Surgery</a>             | Completed              | Has Results          | •Pancreatic Cancer                      | •Drug: Sorafenib<br>•Drug: Erlotinib                         | <ul style="list-style-type: none"> <li>•Purchase Cancer Group - Paducah, Paducah, Kentucky, United States</li> <li>•Erlanger Cancer Center at Erlanger Hospital - Baroness, Chattanooga, Tennessee, United States</li> <li>•Baptist Regional Cancer Center at Baptist Riverside, Knoxville, Tennessee, United States</li> <li>•Vanderbilt-Ingram Cancer Center - Cool Springs, Nashville, Tennessee, United States</li> <li>•Vanderbilt-Ingram Cancer Center at Franklin, Nashville, Tennessee, United States</li> <li>•Vanderbilt-Ingram Cancer Center, Nashville, Tennessee, United States</li> </ul>                                                                                                                                                                                                                                                                       |
| 39 | <a href="#">Mitoxantrone, Prednisone Plus Sorafenib in Taxane-Refractory Metastatic Hormone Refractory Prostate Cancer (HRPC)</a> | Terminated             | Has Results          | •Metastatic Prostate Cancer             | •Drug: Mitoxantrone<br>•Drug: Prednisone<br>•Drug: Sorafenib | <ul style="list-style-type: none"> <li>•Wilshire Oncology Medical Group, Inc., La Verne, California, United States</li> <li>•Peachtree Hematology Oncology Consultants, Atlanta, Georgia, United States</li> <li>•Central Georgia Cancer Care, Macon, Georgia, United States</li> <li>•Northwest Georgia Oncology Centers, Marietta, Georgia, United States</li> <li>•Hematology Oncology Centers of the Northern Rockies, PC, Billings, Montana, United States</li> <li>•Mid-Ohio Oncology/Hematology, Inc., Columbus, Ohio, United States</li> <li>•Lancaster Cancer Center, Lancaster, Pennsylvania, United States</li> <li>•Pennsylvania Oncology Hematology Associates, Philadelphia, Pennsylvania, United States</li> <li>•The West Clinic, Memphis, Tennessee, United States</li> <li>•Cancer Specialists of Tidewater, Chesapeake, Virginia, United States</li> </ul> |
| 40 | <a href="#">Sorafenib to Overcome Resistance to Systemic Chemotherapy in Androgen-independent Prostate Cancer</a>                 | Completed              | Has Results          | •Prostate Cancer                        | •Drug: Sorafenib                                             | <ul style="list-style-type: none"> <li>•Oncology Specialists, S.C, Niles, Illinois, United States</li> <li>•Oncology Specialists, S.C, Park Ridge, Illinois, United States</li> </ul>                                                                                                                                                                                                                                                                                                                                                                                                                                                                                                                                                                                                                                                                                         |

|    | Title                                                                                                                                         | Status         | Study Results        | Conditions                  | Interventions                                                                                                                                   | Locations                                                                                                                                                                                                                                                                                                                                                                                                                                                                                                                                                                                                                                                                                                                                                                                                                                                                                                                                             |
|----|-----------------------------------------------------------------------------------------------------------------------------------------------|----------------|----------------------|-----------------------------|-------------------------------------------------------------------------------------------------------------------------------------------------|-------------------------------------------------------------------------------------------------------------------------------------------------------------------------------------------------------------------------------------------------------------------------------------------------------------------------------------------------------------------------------------------------------------------------------------------------------------------------------------------------------------------------------------------------------------------------------------------------------------------------------------------------------------------------------------------------------------------------------------------------------------------------------------------------------------------------------------------------------------------------------------------------------------------------------------------------------|
| 41 | <a href="#">Sorafenib in Treating Patients With Metastatic or Recurrent Prostate Cancer</a>                                                   | Completed      | No Results Available | •Prostate Cancer            | •Drug: sorafenib tosylate                                                                                                                       | <ul style="list-style-type: none"> <li>•Tom Baker Cancer Centre - Calgary, Calgary, Alberta, Canada</li> <li>•British Columbia Cancer Agency - Centre for the Southern Interior, Kelowna, British Columbia, Canada</li> <li>•British Columbia Cancer Agency - Vancouver Cancer Centre, Vancouver, British Columbia, Canada</li> <li>•CancerCare Manitoba, Winnipeg, Manitoba, Canada</li> <li>•Margaret and Charles Juravinski Cancer Centre, Hamilton, Ontario, Canada</li> <li>•London Regional Cancer Program at London Health Sciences Centre, London, Ontario, Canada</li> <li>•Princess Margaret Hospital, Toronto, Ontario, Canada</li> </ul>                                                                                                                                                                                                                                                                                                  |
| 42 | <a href="#">Nexavar for Neoadjuvant Treatment of Anaplastic Thyroid Cancer</a>                                                                | Unknown status | No Results Available | •Thyroid Cancer, Anaplastic | <ul style="list-style-type: none"> <li>•Drug: Nexavar</li> <li>•Procedure: operation</li> <li>•Radiation: External radiation therapy</li> </ul> | <ul style="list-style-type: none"> <li>•Fujian Medical University Union Hospital, FuZhou, Fujian, China</li> </ul>                                                                                                                                                                                                                                                                                                                                                                                                                                                                                                                                                                                                                                                                                                                                                                                                                                    |
| 43 | <a href="#">Sorafenib, Cisplatin, and Etoposide in Treating Patients With Extensive-Stage Small Cell Lung Cancer</a>                          | Terminated     | Has Results          | •Lung Cancer                | <ul style="list-style-type: none"> <li>•Drug: cisplatin</li> <li>•Drug: etoposide</li> <li>•Drug: sorafenib tosylate</li> </ul>                 | <ul style="list-style-type: none"> <li>•Columbia Presbyterian, New York, New York, United States</li> <li>•Lake/University Ireland Cancer Center, Cleveland, Ohio, United States</li> <li>•Case Medical Center, University Hospitals Seidman Cancer Center, Case Comprehensive Cancer Center, Cleveland, Ohio, United States</li> <li>•MetroHealth Medical Center, Cleveland, Ohio, United States</li> <li>•CCF-Fairview Hospital, Cleveland, Ohio, United States</li> <li>•UHHS Chagrin Highlands Medical Center, Cleveland, Ohio, United States</li> <li>•Southwest General Health Center, Cleveland, Ohio, United States</li> <li>•UHHS Westlake Medical Center, Cleveland, Ohio, United States</li> <li>•Cleveland Clinic Taussig Cancer Institute, Case Comprehensive Cancer Center, Cleveland, Ohio, United States</li> <li>•UH-Monarch, Mayfield Heights, Ohio, United States</li> <li>•UH-Firelands, Sandusky, Ohio, United States</li> </ul> |
| 44 | <a href="#">Study of Sorafenib and Docetaxel in Metastatic Prostate Cancer</a>                                                                | Completed      | No Results Available | •Prostate Cancer            | <ul style="list-style-type: none"> <li>•Drug: Sorafenib (Nexavar)</li> <li>•Drug: Docetaxel</li> </ul>                                          | <ul style="list-style-type: none"> <li>•Dipartimento di Oncologia, dei Trapianti e delle Nuove Tecnologie in Medicina ... Indirizzo: via Roma, 55 - 56100 Pisa Tel. 050-2218690 - Fax. 050-2218685, Pisa, Italy</li> </ul>                                                                                                                                                                                                                                                                                                                                                                                                                                                                                                                                                                                                                                                                                                                            |
| 45 | <a href="#">Combination of Temozolomide and Sorafenib in the Treatment of Radioactive Iodine Refractory Thyroid Cancer</a>                    | Completed      | Has Results          | •Thyroid Cancer             | •Drug: Temozolomide and Sorafenib                                                                                                               | <ul style="list-style-type: none"> <li>•Memorial Sloan-Kettering at Basking Ridge, Basking Ridge, New Jersey, United States</li> <li>•Memorial Sloan-Kettering Cancer Center @ Suffolk, Commack, New York, United States</li> <li>•Memorial Sloan Kettering Cancer Center, New York, New York, United States</li> <li>•Memorial Sloan-Kettering at Mercy Medical Center, Rockville Centre, New York, United States</li> <li>•Memorial Sloan-Kettering Cancer Center at Phelps Memorial Hospital Center, Sleepy Hollow, New York, United States</li> </ul>                                                                                                                                                                                                                                                                                                                                                                                             |
| 46 | <a href="#">Sorafenib Treatment in Non-Small Cell Lung Cancer After Failure of Epidermal Growth Factor Receptor-tyrosine Kinase Inhibitor</a> | Completed      | No Results Available | •Non-Small Cell Lung Cancer | •Drug: sorafenib (Nexavar)                                                                                                                      | <ul style="list-style-type: none"> <li>•WuYiLong, Guangzhou, Guangdong, China</li> </ul>                                                                                                                                                                                                                                                                                                                                                                                                                                                                                                                                                                                                                                                                                                                                                                                                                                                              |

|    | Title                                                                                                                             | Status         | Study Results        | Conditions                                                      | Interventions                                                                                                | Locations                                                                                                                                                                                                                                                                                                                                                                                                               |
|----|-----------------------------------------------------------------------------------------------------------------------------------|----------------|----------------------|-----------------------------------------------------------------|--------------------------------------------------------------------------------------------------------------|-------------------------------------------------------------------------------------------------------------------------------------------------------------------------------------------------------------------------------------------------------------------------------------------------------------------------------------------------------------------------------------------------------------------------|
| 47 | <a href="#">A Phase I/II Study of Cisplatin and Radiation in Combination With Sorafenib in Cervical Cancer</a>                    | Completed      | No Results Available | •Cancer of the Cervix                                           | •Drug: Sorafenib<br>•Drug: Cisplatin<br>•Procedure: Radiation                                                | •Princess Margaret Hospital, Toronto, Ontario, Canada                                                                                                                                                                                                                                                                                                                                                                   |
| 48 | <a href="#">Sorafenib in Combination With Irinotecan in Metastatic Colorectal Cancer Patients With KRAS Mutated Tumors</a>        | Completed      | No Results Available | •Metastatic Colorectal Cancer Patients With KRAS Mutated Tumors | •Drug: Sorafenib and irinotecan combination<br>•Drug: Sorafenib monotherapy<br>•Drug: Irinotecan monotherapy | •Hôpital AVICENNE, Bobigny, France<br>•Centre François Baclesse, Caen, France<br>•Centre Oscar Lambret, Lille, France<br>•Centre Léon Bérard, Lyon, France<br>•Hôpital LA TIMONE, Marseille, France<br>•CRLC Val d'Aurelle-Paul Lamarque, Montpellier, France<br>•C.H.U. de REIMS, Reims, France<br>•CHU Charles Nicolle, Rouen, France<br>•Institut de Cancérologie de l'Ouest - René Gauducheau, St. Herblain, France |
| 49 | <a href="#">Letrozole Plus Oral Cyclophosphamide Plus/Minus Sorafenib as Primary Systemic Treatment in Breast Cancer Patients</a> | Unknown status | No Results Available | •Breast Cancer                                                  | •Drug: letrozolo+cyclophosphamide<br>•Drug: letrozolo+sorafenib +cyclophosphamide                            | •Breast Unit Azienda Ospedaliera Istituti Ospitalieri, Cremona, Italy<br>•Azienda Ospedaliera S.Luigi Orbassano, Orbassano, Italy                                                                                                                                                                                                                                                                                       |
| 50 | <a href="#">Sorafenib as a Second Line Treatment in Patients With Advanced or Metastatic Gastric Cancer</a>                       | Terminated     | No Results Available | •Gastric Cancer                                                 | •Drug: sorafenib                                                                                             | •Fudan University Cancer Hospital, ShangHai, Shanghai, China                                                                                                                                                                                                                                                                                                                                                            |
| 51 | <a href="#">Sorafenib Therapy Prior to Radiofrequency Ablation for Intermediate Sized Hepatocellular Cancer</a>                   | Completed      | Has Results          | •Hepatocellular Cancer                                          | •Drug: Sorafenib<br>•Procedure: radiofrequency ablation                                                      | •Dana-Farber Cancer Institute, Boston, Massachusetts, United States<br>•Beth Israel Deaconess Medical Center, Boston, Massachusetts, United States                                                                                                                                                                                                                                                                      |
| 52 | <a href="#">Phase I Study of Perifosine + Sorafenib for Patients With Advanced Cancers</a>                                        | Completed      | No Results Available | •Renal Cancer<br>•Tumors                                        | •Drug: Perifosine<br>•Drug: Sorafenib                                                                        |                                                                                                                                                                                                                                                                                                                                                                                                                         |
| 53 | <a href="#">Capecitabine and Cisplatin (XP)+Sorafenib in Advanced Gastric Cancer (AGC): Sorafenib+XP</a>                          | Completed      | Has Results          | •Advanced Gastric Cancer                                        | •Drug: Capecitabine, Cisplatin, Sorafenib                                                                    | •Asan Medical Center, Seoul, Korea, Republic of                                                                                                                                                                                                                                                                                                                                                                         |
| 54 | <a href="#">Erlotinib and Sorafenib in Chemo-naïve Patients With Locally Advanced or Metastatic Non Small Cell Lung Cancer</a>    | Unknown status | No Results Available | •Non-Small Cell Lung Cancer                                     | •Drug: sorafenib + erlotinib                                                                                 | •VU university medical center, Amsterdam, Netherlands<br>•Netherlands Cancer Institute, Amsterdam, Netherlands<br>•University Medical Center Groningen, Groningen, Netherlands<br>•University Hospital Maastricht, Maastricht, Netherlands                                                                                                                                                                              |



|    | Title                                                                                                                                               | Status         | Study Results        | Conditions                                                                                                  | Interventions                                                                                                                                                                                                             | Locations                                                                                                                                                                                                                                                                                                                                                                                                                                                                                                                                                                                                                                                                                                                                                                                                                                                                                     |
|----|-----------------------------------------------------------------------------------------------------------------------------------------------------|----------------|----------------------|-------------------------------------------------------------------------------------------------------------|---------------------------------------------------------------------------------------------------------------------------------------------------------------------------------------------------------------------------|-----------------------------------------------------------------------------------------------------------------------------------------------------------------------------------------------------------------------------------------------------------------------------------------------------------------------------------------------------------------------------------------------------------------------------------------------------------------------------------------------------------------------------------------------------------------------------------------------------------------------------------------------------------------------------------------------------------------------------------------------------------------------------------------------------------------------------------------------------------------------------------------------|
| 55 | <a href="#">A Phase II Study of Bevacizumab + Sorafenib in Metastatic Breast Cancer</a>                                                             | Terminated     | Has Results          | •Metastatic Breast Cancer                                                                                   | <ul style="list-style-type: none"> <li>•Drug: Sorafenib</li> <li>•Drug: Bevacizumab</li> <li>•Other: Imaging</li> </ul>                                                                                                   | <ul style="list-style-type: none"> <li>•Medical &amp; Surgical Specialists, LLC, Galesburg, Illinois, United States</li> <li>•Oncology Hematology Associates of SW Indiana, Evansville, Indiana, United States</li> <li>•Fort Wayne Oncology &amp; Hematology, Inc, Fort Wayne, Indiana, United States</li> <li>•Indiana University Simon Cancer Center, Indianapolis, Indiana, United States</li> <li>•Quality Cancer Center (MCGOP), Indianapolis, Indiana, United States</li> <li>•Arnett Cancer Care, Lafayette, Indiana, United States</li> <li>•Horizon Oncology Center, Lafayette, Indiana, United States</li> <li>•Medical Consultants, P.C., Muncie, Indiana, United States</li> <li>•Northern Indiana Cancer Research Consortium, South Bend, Indiana, United States</li> <li>•Ireland Cancer Center - University Hospitals of Cleveland, Cleveland, Ohio, United States</li> </ul> |
| 56 | <a href="#">Sorafenib in Hormone Naïve Biochemical Recurrence of Prostate Cancer</a>                                                                | Withdrawn      | No Results Available | •Prostate Cancer                                                                                            | <ul style="list-style-type: none"> <li>•Drug: Sorafenib</li> <li>•Drug: Placebo</li> </ul>                                                                                                                                | <ul style="list-style-type: none"> <li>•Fox Chase Cancer Center, Philadelphia, Pennsylvania, United States</li> </ul>                                                                                                                                                                                                                                                                                                                                                                                                                                                                                                                                                                                                                                                                                                                                                                         |
| 57 | <a href="#">Sorafenib and Anastrozole in Treating Postmenopausal Women With Metastatic Breast Cancer</a>                                            | Completed      | Has Results          | <ul style="list-style-type: none"> <li>•Recurrent Breast Cancer</li> <li>•Stage IV Breast Cancer</li> </ul> | <ul style="list-style-type: none"> <li>•Drug: sorafenib tosylate</li> <li>•Drug: anastrozole</li> </ul>                                                                                                                   | <ul style="list-style-type: none"> <li>•Lombardi Comprehensive Cancer Center at Georgetown University, Washington, District of Columbia, United States</li> </ul>                                                                                                                                                                                                                                                                                                                                                                                                                                                                                                                                                                                                                                                                                                                             |
| 58 | <a href="#">Sorafenib Tosylate in Treating Patients With Liver Cancer That Can Be Removed by Surgery</a>                                            | Unknown status | No Results Available | •Liver Cancer                                                                                               | <ul style="list-style-type: none"> <li>•Drug: sorafenib tosylate</li> <li>•Other: laboratory biomarker analysis</li> <li>•Procedure: neoadjuvant therapy</li> <li>•Procedure: therapeutic conventional surgery</li> </ul> | <ul style="list-style-type: none"> <li>•Hopital Beaujon, Clichy, France</li> </ul>                                                                                                                                                                                                                                                                                                                                                                                                                                                                                                                                                                                                                                                                                                                                                                                                            |
| 59 | <a href="#">A Randomized Phase II Trial of Surgery Plus Sorafenib vs. Sorafenib Alone for Hepatocellular Cancer (HCC) With Portal Vein Invasion</a> | Recruiting     | No Results Available | •Hepatocellular Cancer                                                                                      | <ul style="list-style-type: none"> <li>•Procedure: hepatic resection</li> <li>•Drug: Sorafenib</li> </ul>                                                                                                                 | <ul style="list-style-type: none"> <li>•Eastern Hepatobiliary Surgery Hospital, Shanghai, China</li> </ul>                                                                                                                                                                                                                                                                                                                                                                                                                                                                                                                                                                                                                                                                                                                                                                                    |
| 60 | <a href="#">Sorafenib and Erlotinib or Sorafenib Alone in Advanced Non-Small Cell Lung Cancer Progressing on Erlotinib</a>                          | Completed      | Has Results          | •Non-Small Cell Lung Cancer                                                                                 | <ul style="list-style-type: none"> <li>•Drug: Sorafenib</li> <li>•Drug: Erlotinib</li> </ul>                                                                                                                              | <ul style="list-style-type: none"> <li>•Florida Cancer Specialists, Fort Myers, Florida, United States</li> <li>•Northeast Georgia Medical Center, Gainesville, Georgia, United States</li> <li>•Wellstar Cancer Research, Marietta, Georgia, United States</li> <li>•Providence Medical Group, Terre Haute, Indiana, United States</li> <li>•Norton Cancer Institute, Louisville, Kentucky, United States</li> <li>•Hematology Oncology Clinic, LLP, Baton Rouge, Louisiana, United States</li> <li>•Center for Cancer and Blood Disorders, Bethesda, Maryland, United States</li> <li>•National Capital Clinical Research Consortium, Bethesda, Maryland, United States</li> <li>•Jackson Oncology Associates, Jackson, Mississippi, United States</li> <li>•St. Louis Cancer Care, Chesterfield, Missouri, United States</li> <li>•and 6 more</li> </ul>                                   |

|    | Title                                                                                                                                                                                               | Status     | Study Results        | Conditions                                                                                                                              | Interventions                                                                                                                                                                         | Locations                                                                                                                                                                                                                                                                                                                                                                                                                        |
|----|-----------------------------------------------------------------------------------------------------------------------------------------------------------------------------------------------------|------------|----------------------|-----------------------------------------------------------------------------------------------------------------------------------------|---------------------------------------------------------------------------------------------------------------------------------------------------------------------------------------|----------------------------------------------------------------------------------------------------------------------------------------------------------------------------------------------------------------------------------------------------------------------------------------------------------------------------------------------------------------------------------------------------------------------------------|
| 61 | <a href="#">A Study of Combination of Gemcitabine, Oxaliplatin (GEMOX)-Sorafenib in Patients With Advanced Biliary Tract Cancer</a>                                                                 | Terminated | Has Results          | <ul style="list-style-type: none"> <li>•Cholangiocarcinoma</li> <li>•Biliary Tract Cancer</li> <li>•Gallbladder Cancer</li> </ul>       | <ul style="list-style-type: none"> <li>•Drug: Gemcitabine</li> <li>•Drug: Oxaliplatin</li> <li>•Drug: Sorafenib</li> </ul>                                                            | <ul style="list-style-type: none"> <li>•University of Miami, Miami, Florida, United States</li> </ul>                                                                                                                                                                                                                                                                                                                            |
| 62 | <a href="#">BAY 43-9006 Plus Cetuximab to Treat Colorectal Cancer</a>                                                                                                                               | Completed  | Has Results          | <ul style="list-style-type: none"> <li>•Metastatic Colorectal Cancer</li> </ul>                                                         | <ul style="list-style-type: none"> <li>•Drug: Cetuximab</li> <li>•Drug: BAY 43-9006</li> </ul>                                                                                        | <ul style="list-style-type: none"> <li>•National Institutes of Health Clinical Center, 9000 Rockville Pike, Bethesda, Maryland, United States</li> </ul>                                                                                                                                                                                                                                                                         |
| 63 | <a href="#">Sorafenib Gastric Cancer Asian Phase I Study</a>                                                                                                                                        | Completed  | No Results Available | <ul style="list-style-type: none"> <li>•Gastric Cancer</li> </ul>                                                                       | <ul style="list-style-type: none"> <li>•Drug: Sorafenib (Nexavar, BAY43-9006)</li> </ul>                                                                                              | <ul style="list-style-type: none"> <li>•Kashiwa, Chiba, Japan</li> <li>•Kobe, Hyogo, Japan</li> <li>•Chuo-ku, Tokyo, Japan</li> </ul>                                                                                                                                                                                                                                                                                            |
| 64 | <a href="#">Sorafenib and Letrozole, Anastrozole, or Exemestane in Treating Postmenopausal Women With Estrogen Receptor-Positive and/or Progesterone Receptor-Positive Metastatic Breast Cancer</a> | Terminated | Has Results          | <ul style="list-style-type: none"> <li>•Breast Cancer</li> </ul>                                                                        | <ul style="list-style-type: none"> <li>•Drug: anastrozole</li> <li>•Drug: exemestane</li> <li>•Drug: letrozole</li> <li>•Drug: sorafenib tosylate</li> <li>•Other: placebo</li> </ul> | <ul style="list-style-type: none"> <li>•Mayo Clinic in Arizona, Scottsdale, Arizona, United States</li> <li>•Mayo Clinic in Florida, Jacksonville, Florida, United States</li> <li>•Mayo Clinic, Rochester, Minnesota, United States</li> </ul>                                                                                                                                                                                  |
| 65 | <a href="#">Pilot Study of Sorafenib and Bi-weekly Capecitabine in Patients With Advanced Breast and Gastrointestinal Tumors</a>                                                                    | Completed  | No Results Available | <ul style="list-style-type: none"> <li>•Metastatic Breast Cancer</li> <li>•Gastrointestinal Tumors</li> </ul>                           | <ul style="list-style-type: none"> <li>•Drug: Sorafenib</li> <li>•Drug: Capecitabine</li> </ul>                                                                                       | <ul style="list-style-type: none"> <li>•Yale Cancer Center, New Haven, Connecticut, United States</li> </ul>                                                                                                                                                                                                                                                                                                                     |
| 66 | <a href="#">Sorafenib and Vorinostat in Treating Patients With Advanced Liver Cancer</a>                                                                                                            | Completed  | No Results Available | <ul style="list-style-type: none"> <li>•Liver Cancer</li> </ul>                                                                         | <ul style="list-style-type: none"> <li>•Drug: sorafenib tosylate</li> <li>•Drug: vorinostat</li> </ul>                                                                                | <ul style="list-style-type: none"> <li>•Hunter Holmes McGuire VA Medical Center, Richmond, Virginia, United States</li> <li>•Virginia Commonwealth University/Massey Cancer Center, Richmond, Virginia, United States</li> </ul>                                                                                                                                                                                                 |
| 67 | <a href="#">Efficacy and Safety Study of Sorafenib With Topotecan in Patients With Platinum-resistant Recurrent Ovarian Cancer</a>                                                                  | Completed  | No Results Available | <ul style="list-style-type: none"> <li>•Ovarian Cancer</li> </ul>                                                                       | <ul style="list-style-type: none"> <li>•Drug: Sorafenib</li> </ul>                                                                                                                    | <ul style="list-style-type: none"> <li>•Charité Campus Virchow-Klinikum, Berlin, Germany</li> </ul>                                                                                                                                                                                                                                                                                                                              |
| 68 | <a href="#">Sorafenib With Irinotecan in Metastatic Colorectal Cancer (mCRC) and K-RAS Mutation</a>                                                                                                 | Completed  | No Results Available | <ul style="list-style-type: none"> <li>•Metastatic Colorectal Cancer</li> </ul>                                                         | <ul style="list-style-type: none"> <li>•Drug: Nexavar (Sorafenib) and irinotecan (Campto)</li> </ul>                                                                                  | <ul style="list-style-type: none"> <li>•Centre Oscar Lambret, Lille, France</li> <li>•Hopital Saint Eloi, Montpellier, France</li> <li>•Centre Rene Gauducheau, Nantes, France</li> <li>•Centre Antoine Lacassagne, Nice, France</li> <li>•CHU Robert Debre, Reims, France</li> </ul>                                                                                                                                            |
| 69 | <a href="#">Sorafenib and Bevacizumab to Treat Ovarian, Fallopian and Peritoneal Cancer</a>                                                                                                         | Completed  | Has Results          | <ul style="list-style-type: none"> <li>•Ovarian Neoplasm</li> <li>•Fallopian Tube Cancer</li> <li>•Primary Peritoneal Cancer</li> </ul> | <ul style="list-style-type: none"> <li>•Drug: Bevacizumab</li> <li>•Drug: BAY 43-9006</li> </ul>                                                                                      | <ul style="list-style-type: none"> <li>•National Institutes of Health Clinical Center, 9000 Rockville Pike, Bethesda, Maryland, United States</li> </ul>                                                                                                                                                                                                                                                                         |
| 70 | <a href="#">Pharmacokinetic Study of BAY43-9006 and Taxotere to Treat Patient With Prostatic Cancer</a>                                                                                             | Completed  | No Results Available | <ul style="list-style-type: none"> <li>•Primary Disease</li> <li>•Prostate Cancer</li> </ul>                                            | <ul style="list-style-type: none"> <li>•Drug: sorafenib (200 or 400mg bid) and taxotere iv</li> </ul>                                                                                 | <ul style="list-style-type: none"> <li>•St Pierre, Ottignies, Brabant Wallon, Belgium</li> <li>•Cliniques Universitaires St Luc, Brussels, Brussels Capital, Belgium</li> <li>•Notre Dame et Reine Fabiola, Charleroi, Hainaut, Belgium</li> <li>•Clinique Universitaire de Mont Godinne, Yvoir, Namur, Belgium</li> <li>•Sainte Elisabeth, Namur, Belgium</li> <li>•Hôpital Européen Georges Pompidou, Paris, France</li> </ul> |

|    | Title                                                                                                                                                       | Status                 | Study Results        | Conditions                              | Interventions                                                                                                                                              | Locations                                                                                                                                                                                                                                                                                                                                                                                                                                                                                                                                                                                                                                                                                                                                                                                                                                                         |
|----|-------------------------------------------------------------------------------------------------------------------------------------------------------------|------------------------|----------------------|-----------------------------------------|------------------------------------------------------------------------------------------------------------------------------------------------------------|-------------------------------------------------------------------------------------------------------------------------------------------------------------------------------------------------------------------------------------------------------------------------------------------------------------------------------------------------------------------------------------------------------------------------------------------------------------------------------------------------------------------------------------------------------------------------------------------------------------------------------------------------------------------------------------------------------------------------------------------------------------------------------------------------------------------------------------------------------------------|
| 71 | <a href="#">Adjuvant Doxorubicin/Cyclophosphamide and Paclitaxel Plus Sorafenib Breast Cancer</a>                                                           | Completed              | Has Results          | •Breast Cancer                          | <ul style="list-style-type: none"> <li>•Drug: Doxorubicin</li> <li>•Drug: Cyclophosphamide</li> <li>•Drug: Paclitaxel</li> <li>•Drug: Sorafenib</li> </ul> | <ul style="list-style-type: none"> <li>•Integrated Community Oncology Network, Jacksonville, Florida, United States</li> <li>•Florida Hospital Cancer Institute, Orlando, Florida, United States</li> <li>•Consultants in Blood Disorders and Cancer, Louisville, Kentucky, United States</li> <li>•Grand Rapids Clinical Oncology Program, Grand Rapids, Michigan, United States</li> <li>•Methodist Cancer Center, Omaha, Nebraska, United States</li> <li>•Chattanooga Oncology Hematology Associates, Chattanooga, Tennessee, United States</li> <li>•Tennessee Oncology, PLLC, Nashville, Tennessee, United States</li> <li>•Peninsula Cancer Institute, Newport News, Virginia, United States</li> </ul>                                                                                                                                                    |
| 72 | <a href="#">Sorafenib Tosylate With or Without Everolimus in Treating Patients With Advanced, Radioactive Iodine Refractory Hurthle Cell Thyroid Cancer</a> | Active, not recruiting | Has Results          | •Refractory Hurthle Cell Thyroid Cancer | <ul style="list-style-type: none"> <li>•Drug: sorafenib</li> <li>•Drug: everolimus</li> </ul>                                                              | <ul style="list-style-type: none"> <li>•Mayo Clinic in Florida, Jacksonville, Florida, United States</li> <li>•Northwestern University, Chicago, Illinois, United States</li> <li>•Siouxland Regional Cancer Center, Sioux City, Iowa, United States</li> <li>•University of Michigan Comprehensive Cancer Center, Ann Arbor, Michigan, United States</li> <li>•Mayo Clinic, Rochester, Minnesota, United States</li> <li>•Nebraska Methodist Hospital, Omaha, Nebraska, United States</li> <li>•Memorial Sloan Kettering Basking Ridge, Basking Ridge, New Jersey, United States</li> <li>•Memorial Sloan Kettering Monmouth, Middletown, New Jersey, United States</li> <li>•Memorial Sloan Kettering Bergen, Montvale, New Jersey, United States</li> <li>•Memorial Sloan Kettering Commack, Commack, New York, United States</li> <li>•and 11 more</li> </ul> |
| 73 | <a href="#">Study of Sorafenib/Cetuximab in Head and Neck Cancer</a>                                                                                        | Completed              | Has Results          | •Squamous Cell Cancer                   | <ul style="list-style-type: none"> <li>•Drug: Sorafenib</li> <li>•Drug: Cetuximab</li> </ul>                                                               | <ul style="list-style-type: none"> <li>•Duke University Health System, Durham, North Carolina, United States</li> </ul>                                                                                                                                                                                                                                                                                                                                                                                                                                                                                                                                                                                                                                                                                                                                           |
| 74 | <a href="#">Study of Combination of Metronomic Oral Vinorelbine and Sorafenib in Patients With Advanced Non-small Cell Lung Cancer</a>                      | Completed              | No Results Available | •Non-Small Cell Lung Cancer             | <ul style="list-style-type: none"> <li>•Drug: oral vinorelbine</li> <li>•Drug: sorafenib</li> </ul>                                                        | <ul style="list-style-type: none"> <li>•National Cancer Centre, Singapore, Singapore, Singapore</li> </ul>                                                                                                                                                                                                                                                                                                                                                                                                                                                                                                                                                                                                                                                                                                                                                        |

|    | Title                                                                                                                                                               | Status                 | Study Results        | Conditions         | Interventions                                                                                                                                                             | Locations                                                                                                                                                                                                                                                                                                                                                                                                                                                                                                                                                                                                                                                                                                                                                                                                                                                                                                                                                                                                                                                       |
|----|---------------------------------------------------------------------------------------------------------------------------------------------------------------------|------------------------|----------------------|--------------------|---------------------------------------------------------------------------------------------------------------------------------------------------------------------------|-----------------------------------------------------------------------------------------------------------------------------------------------------------------------------------------------------------------------------------------------------------------------------------------------------------------------------------------------------------------------------------------------------------------------------------------------------------------------------------------------------------------------------------------------------------------------------------------------------------------------------------------------------------------------------------------------------------------------------------------------------------------------------------------------------------------------------------------------------------------------------------------------------------------------------------------------------------------------------------------------------------------------------------------------------------------|
| 75 | <a href="#">Phase 2b Study of Taxol Plus Sorafenib or Placebo in Patients With Advanced Breast Cancer</a>                                                           | Active, not recruiting | No Results Available | •Breast Cancer     | <ul style="list-style-type: none"> <li>•Drug: paclitaxel</li> <li>•Drug: sorafenib tosylate</li> <li>•Other: placebo</li> </ul>                                           | <ul style="list-style-type: none"> <li>•Northwest Alabama Cancer Center, PC - Muscle Shoals, Muscle Shoals, Alabama, United States</li> <li>•Highlands Oncology Group - Fayetteville, Fayetteville, Arkansas, United States</li> <li>•Pacific Cancer Medical Center, Incorporated, Anaheim, California, United States</li> <li>•Pacific Coast Hematology/Oncology Medical Group, Incorporated, Fountain Valley, California, United States</li> <li>•Desert Hematology-Oncology Medical Group, Incorporated, Rancho Mirage, California, United States</li> <li>•Sutter Cancer Center, Sacramento, California, United States</li> <li>•Saint Helena, California, United States</li> <li>•Cancer Prevention and Treatment Center at Dominican and Watsonville Community Hospital, Soquel, California, United States</li> <li>•Helen and Harry Gray Cancer Center at Hartford Hospital, Hartford, Connecticut, United States</li> <li>•Eastern Connecticut Hematology and Oncology Associates, Norwich, Connecticut, United States</li> <li>•and 33 more</li> </ul> |
| 76 | <a href="#">Gemcitabine With or Without Sorafenib in Treating Patients With Locally Advanced or Metastatic Pancreatic Cancer</a>                                    | Unknown status         | No Results Available | •Pancreatic Cancer | <ul style="list-style-type: none"> <li>•Drug: gemcitabine hydrochloride</li> <li>•Drug: sorafenib tosylate</li> </ul>                                                     | <ul style="list-style-type: none"> <li>•Marseille Institute of Cancer - Institut J. Paoli and I. Calmettes, Marseille, France</li> </ul>                                                                                                                                                                                                                                                                                                                                                                                                                                                                                                                                                                                                                                                                                                                                                                                                                                                                                                                        |
| 77 | <a href="#">Sorafenib and High-Dose Carboplatin, Paclitaxel, and External-Beam Radiation Therapy in Treating Patients With Stage III Non-Small Cell Lung Cancer</a> | Withdrawn              | No Results Available | •Lung Cancer       | <ul style="list-style-type: none"> <li>•Drug: carboplatin</li> <li>•Drug: paclitaxel</li> <li>•Drug: sorafenib tosylate</li> <li>•Radiation: radiation therapy</li> </ul> | <ul style="list-style-type: none"> <li>•Arlington Cancer Center - Arlington, Arlington, Texas, United States</li> <li>•Simmons Comprehensive Cancer Center at University of Texas Southwestern Medical Center - Dallas, Dallas, Texas, United States</li> </ul>                                                                                                                                                                                                                                                                                                                                                                                                                                                                                                                                                                                                                                                                                                                                                                                                 |
| 78 | <a href="#">Sorafenib Tosylate With or Without Everolimus in Treating Patients With Localized, Unresectable, or Metastatic Liver Cancer</a>                         | Completed              | No Results Available | •Liver Cancer      | <ul style="list-style-type: none"> <li>•Drug: everolimus</li> <li>•Drug: sorafenib tosylate</li> </ul>                                                                    | <ul style="list-style-type: none"> <li>•Medizinische Universität Wien, Wien, Austria</li> <li>•Szent Laszlo Korhaz, Budapest, Hungary</li> <li>•Saint Claraspital AG, Basel, Switzerland</li> <li>•Clinical Cancer Research Center at University Hospital Basel, Basel, Switzerland</li> <li>•Istituto Oncologico della Svizzera Italiana - Ospedale Regionale Bellinzona e Valli, Bellinzona, Switzerland</li> <li>•Inselspital Bern, Bern, Switzerland</li> <li>•Kantonsspital Bruderholz, Bruderholz, Switzerland</li> <li>•Hopital Cantonal Universitaire de Geneve, Geneva, Switzerland</li> <li>•Centre Hospitalier Universitaire Vaudois, Lausanne, Switzerland</li> <li>•Kantonsspital Liestal, Liestal, Switzerland</li> <li>•and 5 more</li> </ul>                                                                                                                                                                                                                                                                                                    |
| 79 | <a href="#">Sorafenib in Treating Patients With Locally Advanced or Metastatic Liver Cancer and Cirrhosis</a>                                                       | Terminated             | No Results Available | •Liver Cancer      | <ul style="list-style-type: none"> <li>•Drug: sorafenib tosylate</li> </ul>                                                                                               | <ul style="list-style-type: none"> <li>•Lineberger Comprehensive Cancer Center at University of North Carolina - Chapel Hill, Chapel Hill, North Carolina, United States</li> <li>•Duke Comprehensive Cancer Center, Durham, North Carolina, United States</li> </ul>                                                                                                                                                                                                                                                                                                                                                                                                                                                                                                                                                                                                                                                                                                                                                                                           |

|    | Title                                                                                                                                                            | Status    | Study Results        | Conditions                  | Interventions                                                                                                                                           | Locations                                                                                                                                                                                                                                                                                                                                                                                                                                                                                                                                                                                                                                                                                                                                                                                                                                                                                     |
|----|------------------------------------------------------------------------------------------------------------------------------------------------------------------|-----------|----------------------|-----------------------------|---------------------------------------------------------------------------------------------------------------------------------------------------------|-----------------------------------------------------------------------------------------------------------------------------------------------------------------------------------------------------------------------------------------------------------------------------------------------------------------------------------------------------------------------------------------------------------------------------------------------------------------------------------------------------------------------------------------------------------------------------------------------------------------------------------------------------------------------------------------------------------------------------------------------------------------------------------------------------------------------------------------------------------------------------------------------|
| 80 | <a href="#">Sorafenib/Erlotinib Versus Erlotinib Alone in Previously Treated Advanced Non-Small-Cell Lung Cancer (NSCLC)</a>                                     | Completed | Has Results          | •Non-Small Cell Lung Cancer | <ul style="list-style-type: none"> <li>•Drug: Erlotinib + Sorafenib</li> <li>•Drug: Erlotinib + Placebo</li> </ul>                                      | <ul style="list-style-type: none"> <li>•Florida Cancer Specialists, Fort Myers, Florida, United States</li> <li>•Northeast Georgia Medical Center, Gainesville, Georgia, United States</li> <li>•Wellstar Cancer Research, Marietta, Georgia, United States</li> <li>•Kansas City Cancer Centers, Overland Park, Kansas, United States</li> <li>•Center for Cancer and Blood Disorders, Bethesda, Maryland, United States</li> <li>•Grand Rapids Clinical Oncology Program, Grand Rapids, Michigan, United States</li> <li>•Methodist Cancer Center, Omaha, Nebraska, United States</li> <li>•Cancer Care of Western North Carolina, Asheville, North Carolina, United States</li> <li>•Oncology Hematology Care, Cincinnati, Ohio, United States</li> <li>•Mid Ohio Oncology/Hematology, Inc./ The Mark H. Zangmeister Center, Columbus, Ohio, United States</li> <li>•and 6 more</li> </ul> |
| 81 | <a href="#">BAY 43-9006 in Previously Untreated Patients With Non-Small Cell Lung Cancer (NSCLC)</a>                                                             | Completed | No Results Available | •Lung Cancer                | <ul style="list-style-type: none"> <li>•Drug: BAY 43-9006</li> <li>•Drug: Paclitaxel</li> <li>•Drug: Carboplatin</li> <li>•Drug: Bevacizumab</li> </ul> | <ul style="list-style-type: none"> <li>•University of Texas MD Anderson Cancer Center, Houston, Texas, United States</li> </ul>                                                                                                                                                                                                                                                                                                                                                                                                                                                                                                                                                                                                                                                                                                                                                               |
| 82 | <a href="#">Evaluate Safety and Tolerability in Dose Escalation of Sorafenib in Advanced Renal Cell Cancer</a>                                                   | Completed | Has Results          | •Renal Cell Cancer          | <ul style="list-style-type: none"> <li>•Drug: sorafenib</li> </ul>                                                                                      | <ul style="list-style-type: none"> <li>•University of Kansas Medical Center, Kansas City, Kansas, United States</li> </ul>                                                                                                                                                                                                                                                                                                                                                                                                                                                                                                                                                                                                                                                                                                                                                                    |
| 83 | <a href="#">Pemetrexed Disodium With or Without Sorafenib as Second-Line Therapy in Treating Patients With Stage IIIB or Stage IV Non-Small Cell Lung Cancer</a> | Completed | Has Results          | •Lung Cancer                | <ul style="list-style-type: none"> <li>•Drug: pemetrexed disodium</li> <li>•Drug: sorafenib tosylate</li> </ul>                                         | <ul style="list-style-type: none"> <li>•Mayo Clinic Scottsdale, Scottsdale, Arizona, United States</li> <li>•Aurora Presbyterian Hospital, Aurora, Colorado, United States</li> <li>•Boulder Community Hospital, Boulder, Colorado, United States</li> <li>•Penrose Cancer Center at Penrose Hospital, Colorado Springs, Colorado, United States</li> <li>•St. Anthony Central Hospital, Denver, Colorado, United States</li> <li>•Porter Adventist Hospital, Denver, Colorado, United States</li> <li>•Presbyterian - St. Luke's Medical Center, Denver, Colorado, United States</li> <li>•St. Joseph Hospital, Denver, Colorado, United States</li> <li>•Rose Medical Center, Denver, Colorado, United States</li> <li>•CCOP - Colorado Cancer Research Program, Denver, Colorado, United States</li> <li>•and 197 more</li> </ul>                                                          |

|    | Title                                                                                                                                                              | Status                 | Study Results        | Conditions                                                                   | Interventions                                                                                                                                                  | Locations                                                                                                                                                                                                                                                                                                                                                                                                                                                                                                                                                                                                               |
|----|--------------------------------------------------------------------------------------------------------------------------------------------------------------------|------------------------|----------------------|------------------------------------------------------------------------------|----------------------------------------------------------------------------------------------------------------------------------------------------------------|-------------------------------------------------------------------------------------------------------------------------------------------------------------------------------------------------------------------------------------------------------------------------------------------------------------------------------------------------------------------------------------------------------------------------------------------------------------------------------------------------------------------------------------------------------------------------------------------------------------------------|
| 84 | <a href="#">Sorafenib + Topotecan for Platinum-Resistant Recurrent Ovarian Cancer</a>                                                                              | Terminated             | Has Results          | •Ovarian Cancer                                                              | •Drug: Sorafenib<br>•Drug: Topotecan                                                                                                                           | •Medical & Surgical Specialists, LLC, Galesburg, Illinois, United States<br>•Oncology Hematology Associates of SW Indiana, Evansville, Indiana, United States<br>•Fort Wayne Oncology & Hematology, Inc, Fort Wayne, Indiana, United States<br>•Indiana University Simon Cancer Center, Indianapolis, Indiana, United States<br>•St. Vincent Hospital Gynecologic Oncology, Indianapolis, Indiana, United States<br>•Arnett Cancer Care, Lafayette, Indiana, United States<br>•Medical Consultants, P.C., Muncie, Indiana, United States<br>•Schwartz Gynecologic Oncology, PLLC, Brightwaters, New York, United States |
| 85 | <a href="#">2nd Line Treatment With Pemetrexed and Sorafenib for Recurrent or Metastatic Triple Negative Breast Cancer</a>                                         | Terminated             | Has Results          | •Breast Cancer<br>•Metastatic Breast Cancer<br>•Recurrent Breast Cancer      | •Drug: Experimental Arm A: Pemetrexed<br>•Drug: Experimental Arm A: Sorafenib<br>•Drug: Experimental Arm B: Pemetrexed<br>•Drug: Experimental Arm B: Sorafenib | •Virginia Commonwealth University/Massey Cancer Center, Richmond, Virginia, United States                                                                                                                                                                                                                                                                                                                                                                                                                                                                                                                               |
| 86 | <a href="#">Study of Gemcitabine and Erlotinib Plus Sorafenib (GES) in Metastatic Pancreatic Cancer</a>                                                            | Completed              | Has Results          | •Pancreatic Cancer                                                           | •Drug: Gemcitabine<br>•Drug: Erlotinib<br>•Drug: Sorafenib                                                                                                     | •Desert Regional Medical Center, Palm Springs, California, United States<br>•Bellevue Hospital, New York, New York, United States<br>•New York University Cancer Center, New York, New York, United States                                                                                                                                                                                                                                                                                                                                                                                                              |
| 87 | <a href="#">A Phase II Study Of Abraxane and Nexavar in the First-Line Treatment of Locally Advanced or Metastatic Breast Cancer</a>                               | Terminated             | No Results Available | •Breast Cancer                                                               | •Drug: Paclitaxel Albumin Nanoparticle for Injectable Suspension (Abraxane)<br>•Drug: Sorafenib (Nexavar)                                                      | •Veeda Oncology, Columbus, Ohio, United States                                                                                                                                                                                                                                                                                                                                                                                                                                                                                                                                                                          |
| 88 | <a href="#">Sorafenib in Treating Patients With Extensive Stage Small Cell Lung Cancer</a>                                                                         | Completed              | Has Results          | •Extensive Stage Small Cell Lung Cancer<br>•Recurrent Small Cell Lung Cancer | •Drug: sorafenib tosylate                                                                                                                                      | •SWOG, Portland, Oregon, United States                                                                                                                                                                                                                                                                                                                                                                                                                                                                                                                                                                                  |
| 89 | <a href="#">Phase I Trial of Bevacizumab and Temsirolimus in Combination With 1) Carboplatin, 2) Paclitaxel, 3) Sorafenib for the Treatment of Advanced Cancer</a> | Active, not recruiting | No Results Available | •Advanced Cancer                                                             | •Drug: Temsirolimus<br>•Drug: Bevacizumab<br>•Drug: Paclitaxel<br>•Drug: Sorafenib<br>•Drug: Carboplatin                                                       | •University of Texas MD Anderson Cancer Center, Houston, Texas, United States                                                                                                                                                                                                                                                                                                                                                                                                                                                                                                                                           |
| 90 | <a href="#">Activity of Sorafenib in Salivary Gland Cancer</a>                                                                                                     | Completed              | No Results Available | •Salivary Gland Cancer                                                       | •Drug: Sorafenib                                                                                                                                               | •IRCCS Istituto Nazionale Tumori, Milano, Italy                                                                                                                                                                                                                                                                                                                                                                                                                                                                                                                                                                         |
| 91 | <a href="#">Phase I Study of Weekly Topotecan in Combination With Sorafenib in Treatment of Relapsed Small Cell Lung Cancer</a>                                    | Completed              | No Results Available | •Small Cell Carcinoma<br>•Lung Cancer                                        | •Drug: Topotecan<br>•Drug: Sorafenib                                                                                                                           | •Park Nicollet Institute, St. Louis Park, Minnesota, United States                                                                                                                                                                                                                                                                                                                                                                                                                                                                                                                                                      |
| 92 | <a href="#">The Effects of Sorafenib on Molecular Barrett's Esophagus Cancer</a>                                                                                   | Terminated             | Has Results          | •Esophageal Cancer                                                           | •Drug: sorafenib                                                                                                                                               | •University of Chicago, Chicago, Illinois, United States                                                                                                                                                                                                                                                                                                                                                                                                                                                                                                                                                                |

|     | Title                                                                                                                           | Status         | Study Results        | Conditions                                                                                                               | Interventions                                                                                                         | Locations                                                                                                                                                                                                                                                                                                                                                                                                                                                                                                                                                        |
|-----|---------------------------------------------------------------------------------------------------------------------------------|----------------|----------------------|--------------------------------------------------------------------------------------------------------------------------|-----------------------------------------------------------------------------------------------------------------------|------------------------------------------------------------------------------------------------------------------------------------------------------------------------------------------------------------------------------------------------------------------------------------------------------------------------------------------------------------------------------------------------------------------------------------------------------------------------------------------------------------------------------------------------------------------|
| 93  | <a href="#">Whole Brain Radiotherapy (WBRT) With Sorafenib for Breast Cancer Brain Metastases (BCBM)</a>                        | Completed      | No Results Available | <ul style="list-style-type: none"> <li>Breast Cancer</li> <li>Brain Metastases</li> </ul>                                | <ul style="list-style-type: none"> <li>Radiation: Whole Brain Radiotherapy (WBRT)</li> <li>Drug: Sorafenib</li> </ul> | <ul style="list-style-type: none"> <li>Memoral Sloan Kettering Cancer Center, Basking Ridge, New Jersey, United States</li> <li>Memorial Sloan Kettering Monmouth, Middletown, New Jersey, United States</li> <li>Memorial Sloan Kettering Cancer Center @ Suffolk, Commack, New York, United States</li> <li>Memorial Sloan Kettering Westchester, Harrison, New York, United States</li> <li>Memorial Sloan Kettering Cancer Center, New York, New York, United States</li> <li>Memorial Sloan Kettering Nassau, Uniondale, New York, United States</li> </ul> |
| 94  | <a href="#">Sorafenib Plus Toripalimab for Unresectable HCC With Portal Vein Tumor Thrombus</a>                                 | Unknown status | No Results Available | <ul style="list-style-type: none"> <li>Unresectable Hepatocellular Cancer</li> <li>Portal Vein Tumor Thrombus</li> </ul> | <ul style="list-style-type: none"> <li>Drug: sorafenib; toripalimab</li> </ul>                                        |                                                                                                                                                                                                                                                                                                                                                                                                                                                                                                                                                                  |
| 95  | <a href="#">Sorafenib and Bevacizumab in Combination With Paclitaxel in Patients With Solid Tumors</a>                          | Completed      | No Results Available | <ul style="list-style-type: none"> <li>SOLID TUMORS</li> </ul>                                                           | <ul style="list-style-type: none"> <li>Drug: Sorafenib</li> </ul>                                                     | <ul style="list-style-type: none"> <li>Indiana University Cancer Center, Indianapolis, Indiana, United States</li> </ul>                                                                                                                                                                                                                                                                                                                                                                                                                                         |
| 96  | <a href="#">Sorafenib in Treating Patients With Metastatic or Unresectable Kidney Cancer</a>                                    | Terminated     | Has Results          | <ul style="list-style-type: none"> <li>Kidney Cancer</li> </ul>                                                          | <ul style="list-style-type: none"> <li>Drug: Sorafenib</li> </ul>                                                     | <ul style="list-style-type: none"> <li>UNMC Eppley Cancer Center at the University of Nebraska Medical Center, Omaha, Nebraska, United States</li> </ul>                                                                                                                                                                                                                                                                                                                                                                                                         |
| 97  | <a href="#">Sorafenib Tosylate With or Without Pravastatin in Treating Patients With Liver Cancer and Cirrhosis</a>             | Completed      | No Results Available | <ul style="list-style-type: none"> <li>Liver Cancer</li> </ul>                                                           | <ul style="list-style-type: none"> <li>Drug: pravastatin sodium</li> <li>Drug: sorafenib tosylate</li> </ul>          | <ul style="list-style-type: none"> <li>Hopital Du Bocage, Dijon, France</li> </ul>                                                                                                                                                                                                                                                                                                                                                                                                                                                                               |
| 98  | <a href="#">Sorafenib in Treating Patients With Metastatic Kidney Cancer That Has Not Responded to Sunitinib or Bevacizumab</a> | Completed      | Has Results          | <ul style="list-style-type: none"> <li>Kidney Cancer</li> </ul>                                                          | <ul style="list-style-type: none"> <li>Drug: sorafenib tosylate</li> </ul>                                            | <ul style="list-style-type: none"> <li>Cleveland Clinic Taussig Cancer Institute, Case Comprehensive Cancer Center, Cleveland, Ohio, United States</li> <li>Baylor Sammons Cancer Center, Dallas, Texas, United States</li> </ul>                                                                                                                                                                                                                                                                                                                                |
| 99  | <a href="#">Sorafenib in Treating Patients Undergoing Surgery for Stage II, Stage III, or Stage IV Kidney Cancer</a>            | Completed      | No Results Available | <ul style="list-style-type: none"> <li>Kidney Cancer</li> </ul>                                                          | <ul style="list-style-type: none"> <li>Drug: sorafenib tosylate</li> </ul>                                            | <ul style="list-style-type: none"> <li>Lineberger Comprehensive Cancer Center at University of North Carolina - Chapel Hill, Chapel Hill, North Carolina, United States</li> </ul>                                                                                                                                                                                                                                                                                                                                                                               |
| 100 | <a href="#">Sorafenib and FOLFIRI Regimen in 2nd Colorectal Cancer (CRC) After Failure of Oxaliplatin Treatment</a>             | Unknown status | No Results Available | <ul style="list-style-type: none"> <li>Colorectal Neoplasms</li> </ul>                                                   | <ul style="list-style-type: none"> <li>Drug: sorafenib</li> <li>Drug: FOLFIRI</li> </ul>                              | <ul style="list-style-type: none"> <li>Cancer Hospital, Fudan University, Shanghai, Shanghai, China</li> </ul>                                                                                                                                                                                                                                                                                                                                                                                                                                                   |

790 additional studies not shown
