# Supplementary material for: Thymoquinone, piperine, and sorafenib combinations attenuate liver and breast cancers progression: epigenetic and molecular docking approaches
Source: PubMed Central journal article supplement (PMC9985300; doi:10.1186/s12906-023-03872-6), 2023-03-04
Supplement: 12906_2023_3872_MOESM4_ESM.pdf [file 12906_2023_3872_MOESM4_ESM.pdf]

**Supplementary File 4: Thymoquinone anticancer clinical trials ClinicalTrials.gov Search Results 07/27/2022**

|   | Title                                                                                                                                        | Status    | Study Results        | Conditions                        | Interventions                                                                                                                                                                        | Locations                                                 |
|---|----------------------------------------------------------------------------------------------------------------------------------------------|-----------|----------------------|-----------------------------------|--------------------------------------------------------------------------------------------------------------------------------------------------------------------------------------|-----------------------------------------------------------|
| 1 | <a href="#">Clinical and Immunohistochemical Evaluation of Chemopreventive Effect of Thymoquinone on Oral Potentially Malignant Lesions.</a> | Completed | No Results Available | •Premalignant Lesion              | <ul style="list-style-type: none"> <li>•Drug: Nigella sativa buccal tablets 10mg</li> <li>•Drug: Nigella sativa buccal tablets 5mg</li> <li>•Drug: Placebo buccal tablets</li> </ul> | •Faculty of Dentistry, Cairo, Egypt                       |
| 2 | <a href="#">Amelioration of Polycystic Ovary Syndrome Related Disorders by Supplementation of Thymoquinone and Metformin</a>                 | Completed | No Results Available | •Polycystic Ovary Syndrome (PCOS) | •Drug: Metformin Versus a combination of Metformin and Thymoquinone (TQ)                                                                                                             | •Saudi German Hospital, Al Madinah, Madinah, Saudi Arabia |

U.S. National Library of Medicine | U.S. National Institutes of Health | U.S. Department of Health & Human Services
