# Supplementary material for: Thymoquinone, piperine, and sorafenib combinations attenuate liver and breast cancers progression: epigenetic and molecular docking approaches
Source: PubMed Central journal article supplement (PMC9985300; doi:10.1186/s12906-023-03872-6), 2023-03-04
Supplement: 12906_2023_3872_MOESM6_ESM.pdf [file 12906_2023_3872_MOESM6_ESM.pdf]

|   | Title                                                                                                                              | Status                 | Study Results        | Conditions                                                                                                                                                                                        | Interventions                                                                                                                                                                                                         | Locations                                                                                                    |
|---|------------------------------------------------------------------------------------------------------------------------------------|------------------------|----------------------|---------------------------------------------------------------------------------------------------------------------------------------------------------------------------------------------------|-----------------------------------------------------------------------------------------------------------------------------------------------------------------------------------------------------------------------|--------------------------------------------------------------------------------------------------------------|
| 1 | <a href="#">Curcumin and Piperine in Reducing Inflammation for Ureteral Stent-Induced Symptoms in Patients With Cancer</a>         | Active, not recruiting | No Results Available | <ul style="list-style-type: none"><li>•Bladder Spasm</li><li>•Malignant Neoplasm</li><li>•Pain</li><li>•Urinary Urgency</li></ul>                                                                 | <ul style="list-style-type: none"><li>•Drug: Curcumin</li><li>•Other: Laboratory Biomarker Analysis</li><li>•Dietary Supplement: Piperine Extract (Standardized)</li><li>•Other: Quality-of-Life Assessment</li></ul> | <ul style="list-style-type: none"><li>•Mayo Clinic, Rochester, Minnesota, United States</li></ul>            |
| 2 | <a href="#">Curcumin and Piperine in Patients on Surveillance for Monoclonal Gammopathy, Smoldering Myeloma or Prostate Cancer</a> | Recruiting             | No Results Available | <ul style="list-style-type: none"><li>•Prostate Cancer</li><li>•Multiple Myeloma</li><li>•Smoldering Multiple Myeloma (SMM)</li><li>•Monoclonal Gammopathy of Undetermined Significance</li></ul> | <ul style="list-style-type: none"><li>•Drug: Curcumin plus Piperine</li></ul>                                                                                                                                         | <ul style="list-style-type: none"><li>•University of Rochester, Rochester, New York, United States</li></ul> |
